# Supplementary material
Source: MDPI journal article supplement (https://www.mdpi.com/2227-7102/13/6/545)
Supplement: s1 [file s1]

Archive with 2 entries (2 files):
- Supplement File S1- Case synposis and guiding questions.pdf
- Supplement Table S1- Mapping of Learning Objectives to Embedded Student Questions.pdf
